# Supplementary material for: Enrichment of cancer-initiating cells from colon cancer cells through porous polymeric membranes by a membrane filtration method
Source: Royal Society of Chemistry journal article supplement (doi:10.1039/d0tb02312d), 2020-01-01
Supplement: d0tb02312d1.pdf [file d0tb02312d1.pdf]

**Enrichment of cancer-initiating cells from colon cancer cells through porous polymeric  
membranes by membrane filtration method**

Tzu-Cheng Sung,<sup>†a,b</sup> Wei-Lun Huang,<sup>†a</sup> Lee-Kiat Ban,<sup>†c</sup> Henry Hsin-Chung Lee,<sup>†c,d</sup> Jia-Hua Wang,<sup>a</sup> Her-Young Su,<sup>e</sup> Shih Hsi Jen,<sup>f</sup> Yen-Hsiang Chang,<sup>g</sup> Jen-Ming Yang,<sup>\*h</sup> Akon Higuchi<sup>\*a,b,i,j,k</sup> and Qingsong Ye<sup>l,m,n</sup>

<sup>a</sup>Department of Chemical and Materials Engineering, National Central University, No. 300, Jhongda RD., Jhongli, Taoyuan, 32001 Taiwan. E-mail: higuchi@ncu.edu.tw; Fax: +886-3-2804271; Tel: +886-3-4227151 ext.34257

<sup>b</sup>School of Ophthalmology and Optometry, Eye Hospital, Wenzhou Medical University, No. 270, Xueyuan Road, Wenzhou, Zhejiang, 325027, China

<sup>c</sup>Department of Surgery, Hsinchu Cathay General Hospital, No. 678, Sec 2, Zhonghua Rd., Hsinchu, 30060, Taiwan

<sup>d</sup>Graduate Institute of Translational and Interdisciplinary Medicine, National Central University, No. 300, Jhongda RD., Jhongli, Taoyuan, 32001 Taiwan

<sup>e</sup>Department of Obstetrics and Gynecology, Bobson Yuho Women and Children's Clinic, No. 182, Zhuangjing S. Rd., Zhubei City, Hsinchu 302, Taiwan

<sup>f</sup>Department of Obstetrics and Gynecology, Taiwan Landseed Hospital, 77, Kuangtai Road, Pingjen City, Taoyuan 32405, Taiwan

<sup>g</sup>Department of Chemical and Materials Engineering, Chang Gung University, Guishan, Taoyuan 333, Taiwan

<sup>h</sup>Department of Chemical and Materials Engineering, Chang Gung University, Guishan, Taoyuan 333, Taiwan. E-mail: jmyang@mail.cgu.edu.tw; Fax: +886-3-2118668; Tel: +886-3-2118800 ext. 5290

<sup>i</sup>Department of Chemical Engineering and R&D Center for Membrane Technology, Chung Yuan Christian University, Chungli, Taoyuan 320, Taiwan

<sup>j</sup>Center for Emergent Matter Science, Riken, 2-1 Hirosawa, Wako, Saitama 351-0198, Japan

<sup>k</sup>Wenzhou Institute, University of Chinese Academy of Science, No. 16, Xinsan Road, Hi-tech Industry Park, Wenzhou, Zhejiang, China

<sup>l</sup>Regenerative Dentistry Group, School of Dentistry, The University of Queensland, 288 Herston Road, Herston Qld, Brisbane 4006, Australia

<sup>m</sup>Skeletal Biology Research Center, OMFS, Massachusetts General Hospital & Harvard School of Dental Medicine, Boston, MA02114, USA

<sup>n</sup>School and Hospital of Stomatology, Wenzhou Medical University, Wenzhou, Zhejiang, China

<sup>†</sup> These authors contributed equally to this work.

**Table S1** Materials used in this study.

| Materials                                                  | Abbreviation        | Catalog No. | Company                                                                  |
|------------------------------------------------------------|---------------------|-------------|--------------------------------------------------------------------------|
| <b>Polymer</b>                                             |                     |             |                                                                          |
| Poly(lactide-co-glycolic acid)<br>(lactide:glycolic=75:25) | PLGA                | P1941       | Sigma-Aldrich (St. Louis, MO, USA)                                       |
| Silk screen                                                | Silk                | 170 mesh    | Yuzawayaya, Tokyo, Japan                                                 |
| <b>Cells</b>                                               |                     |             |                                                                          |
| LoVo cells                                                 | LoVo cells          | 60148       | BCRC, Food Industry Research and Development Institute (Hsinchu, Taiwan) |
| <b>Cell culture dishes</b>                                 |                     |             |                                                                          |
| 6-well tissue culture polystyrene plate                    | TCPS                | #353046     | Corning (Corning, NY, USA)                                               |
| <b>Chemicals</b>                                           |                     |             |                                                                          |
| 2-Hydroxyethyl agarose                                     | Agarose             | A4018       | Sigma-Aldrich (St. Louis, MO, USA)                                       |
| High-vacuum grease                                         | High-vacuum grease  | 1658832     | Dow Corning Corporation, Midland, MI, USA                                |
| Human CEA ELISA kit                                        | Human CEA ELISA kit | EHCEA       | Thermo Fisher Scientific Inc. (Waltham, MA, USA)                         |
| <b>Cell culture medium and component</b>                   |                     |             |                                                                          |
| DMEM                                                       | DMEM                | D5648-10x1L | Sigma-Aldrich (St. Louis, MO, USA)                                       |
| Fetal bovine serum                                         | FBS                 | 04-001-1A   | Biological Industries, Kibbutz Beit-Haemek, Israel                       |
| Hoechst 33342                                              | Hoechst             | PA-3014     | Lonza (Basel, Switzerland)                                               |
| <b>Surface markers</b>                                     |                     |             |                                                                          |
| 7-AAD Viability dye                                        | 7-AAD               | 559925      | BD Biosciences (San Jose, CA, USA)                                       |
| FITC mouse anti-human CD44                                 | FITC anti-CD44      | 555478      | BD Biosciences (San Jose, CA, USA)                                       |
| PE mouse anti-human CD133/1                                | PE anti-CD133       | 130-080-801 | Miltenyi Biotech (Bergisch Gladbach, North Rhine-Westphalia, Germany)    |
| FITC Mouse IgG2b $\kappa$ , isotype control                | FITC isotype        | 555742      | BD Biosciences (San Jose, CA, USA)                                       |
| PE Mouse IgG1 $\kappa$ , isotype control                   | PE isotype          | 555749      | BD Biosciences (San Jose, CA, USA)                                       |
| Nylon mesh filter (r=11 $\mu$ m)                           | NY11                | NY1104700   | Merck KGaA (Darmstadt, German)                                           |
| Nylon mesh filter (r=20 $\mu$ m)                           | NY20                | NY2004700   | Merck KGaA (Darmstadt, German)                                           |

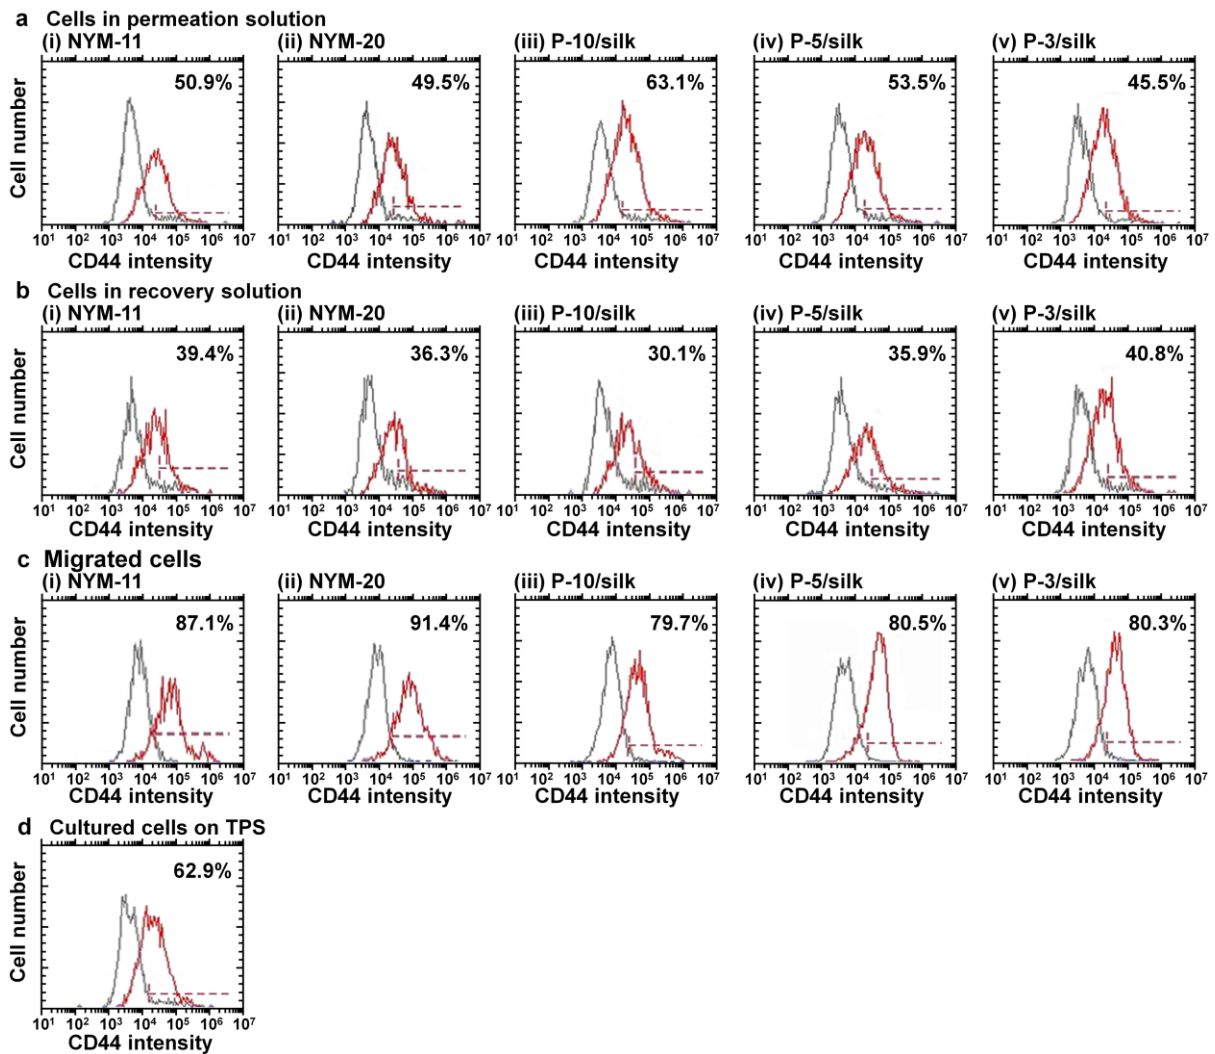

**Fig. S1** Flow cytometry scattergrams of the cells for analysis of CD44 expression after permeation of colon cancer LoVo cells through the NYM and PLGA/silk membranes. (a) CD44 expression on the cells in the permeate solution through the NYM-11 (i), NYM-20 (ii), P-10/silk (iii), P-5/silk (iv) and P-3/silk (v) membranes. (b) CD44 expression on the cells in recovery solution through the NYM-11 (i), NYM-20 (ii), P-10/silk (iii), P-5/silk (iv) and P-3/silk (v) membranes. (c) CD44 expression on the cells migrated through the NYM-11 (i), NYM-20 (ii), P-10/silk (iii), P-5/silk (iv) and P-3/silk (v) membranes. (d) CD44 expression of LoVo cells cultured on TPS dishes. The black solid line indicates isotype antibody expression (negative control).

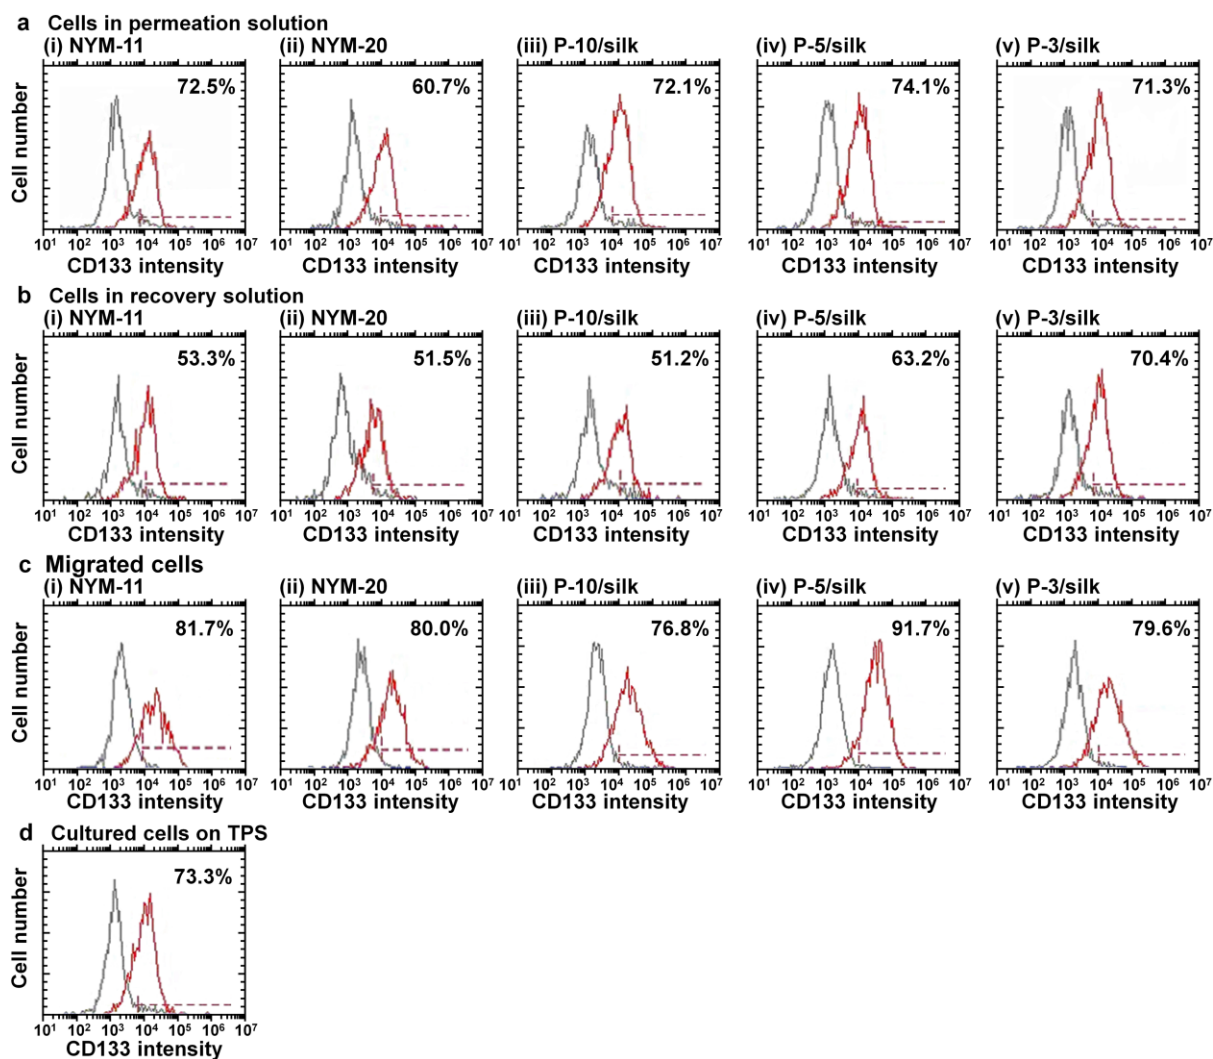

**Fig. S2** Flow cytometry scattergrams of cells for analysis of CD133 expression after permeation of colon cancer LoVo cells through the NYM and PLGA/silk membranes. (a) CD133 expression on the cells in the permeate solution through the NYM-11 (i), NYM-20 (ii), P-10/silk (iii), P-5/silk (iv) and P-3/silk (v) membranes. (b) CD133 expression on the cells in recovery solution through the NYM-11 (i), NYM-20 (ii), P-10/silk (iii), P-5/silk (iv) and P-3/silk (v) membranes. (c) CD133 expression on the cells migrated through the NYM-11 (i), NYM-20 (ii), P-10/silk (iii), P-5/silk (iv) and P-3/silk (v) membranes. (d) CD133 expression in LoVo cells cultured on TPS dishes. The black solid line indicates isotype antibody expression (negative control).
